# Supplementary material
Source: PubMed Central journal article supplement (PMC5837020)

Supplementary Figure 1 - uncropped scans with size marker indications

Figure 1a

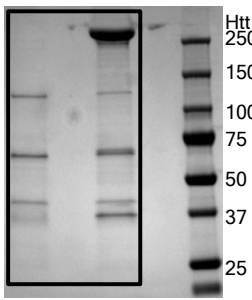

Figure 1b

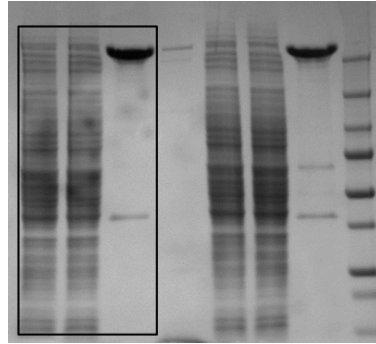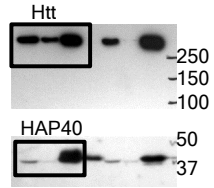

Figure 1c

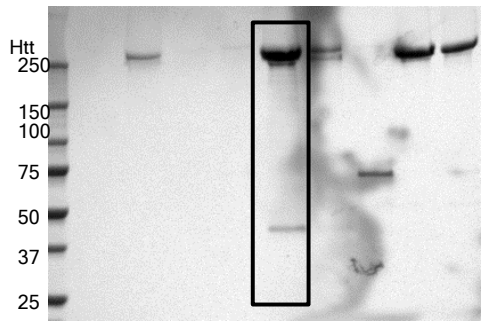

Extended Data Figure 1a

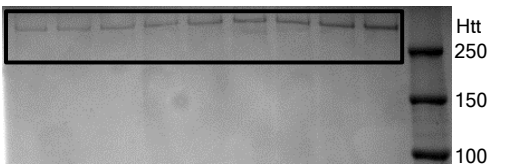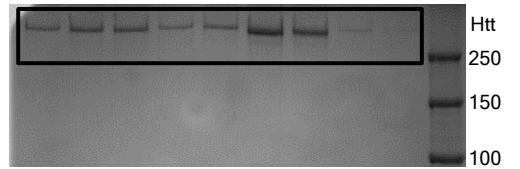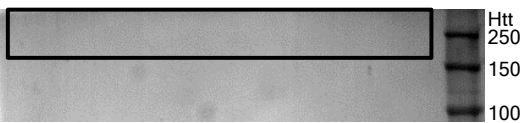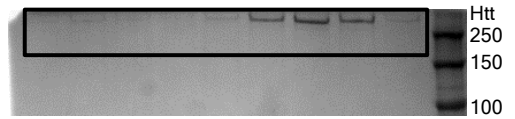

Extended Data Figure 1b

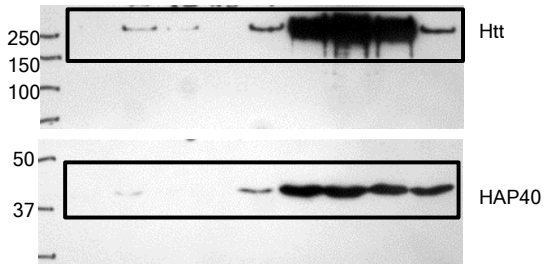

Extended Data Figure 6b

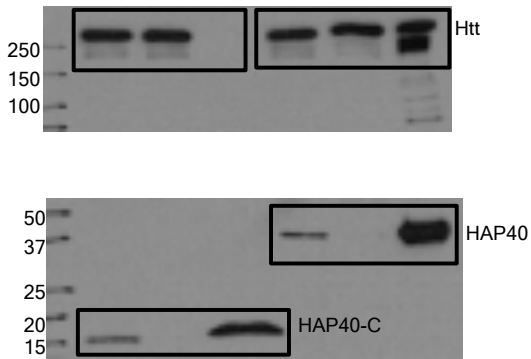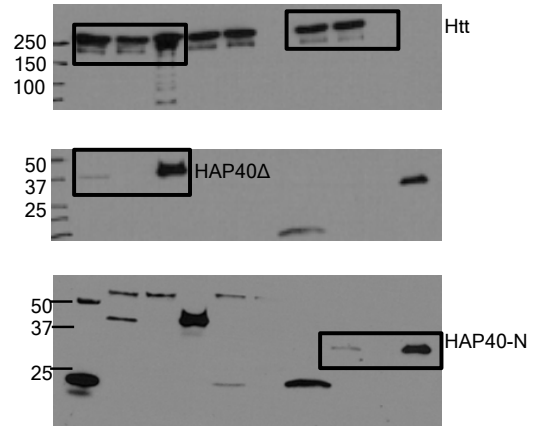

Supplement: NIHMS75650-supplement-Supplementary_figure.pdf [file NIHMS75650-supplement-Supplementary_figure.pdf]
